# Supplementary material
Source: MDPI journal article supplement (https://www.mdpi.com/2673-9976/11/1/41)
Supplement: s1 [file s1]

# **Different strategies to tolerate salinity involving water relations**

**Alberto Martinez-Alonso <sup>1,\*</sup>, Micaela Carvajal <sup>1</sup> and Gloria Barzana <sup>1</sup>**

<sup>1</sup>Aquaporins Group, Centro de Edafología y Biología Aplicada del Segura, CEBAS-CSIC, Campus Universitario de Espinardo-25, E-30100, Murcia, Spain.

\*Corresponding autor: [amalonso@cebas.csic.es](mailto:amalonso@cebas.csic.es)

**Abstract:** Salinity is one of the main limiting factors in agriculture, which can affect plants growth and development, as a result of a disruption of homeostasis. Therefore, the understanding of the mechanism of the plants for tolerate salinity stress is essential in order to develop new techniques that may improve tolerance for optimizing crop yields. In this paper, we compare the response of Cucumber (*Cucumis sativus* L.) and tomato (*Solanum lycopersicum* L.), grown by hydroponic culture, to a moderate salinity of NaCl 60 mM. For that, root hydraulic conductance, relative water content of leaves (RWC), stomatal conductance, fresh weight and dry weight ratio, and Na concentration in shoot and root were measured. The results showed a significant decrease of root hydraulic conductance in both species treated with NaCl, revealing a higher resistance to water passage from root to shoot, probably influenced by the increase of Na content after the treatment. In addition, stomatal conductance in cucumber was reduced, accompanied by a decrease of fresh/dry weight ratio in the root. Conversely, neither of those parameters changed in tomato. These experiments confirm the evidence that cucumber and tomato follow different strategies in the adaptation to salinity, being tomato more resistant probably due to the role of membrane water transporters. Despite that, more specific studies would be needed in order to support this conclusion.

**Keywords:** salinity resistance; water relations; water transport; aquaporins; cucumber; tomato.

# Introduction

---

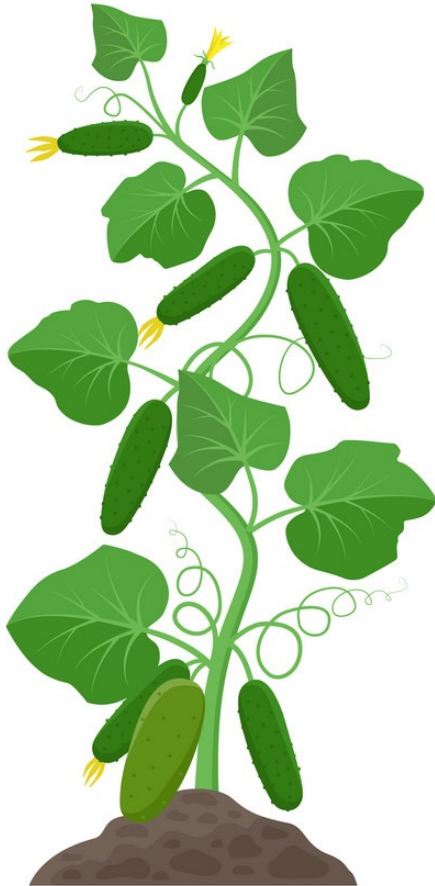

## Salinity

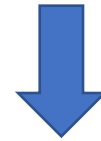

## Osmotic Stress

- Inhibition of growth and development.
- Metabolism alteration.
- **Water deficit**

## Salinity resistance strategies

**Salt avoidance**

**Salt exclusion**

### Osmotic adjustment

- Accumulation of organic solutes.
- Control ions transport pathways.
- **Membrane transporters:** maintain water flow.

# Introduction

---

IECPS  
2021

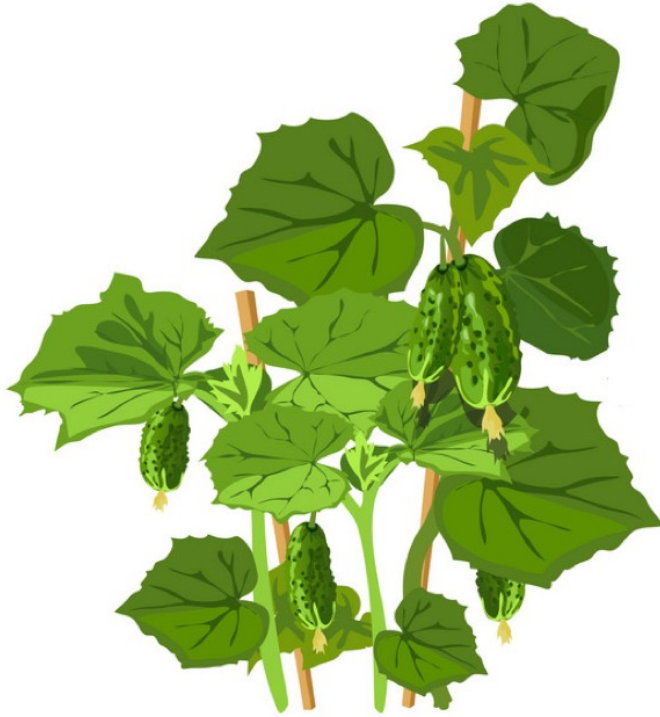

**Cucumber**

Salt sensitive

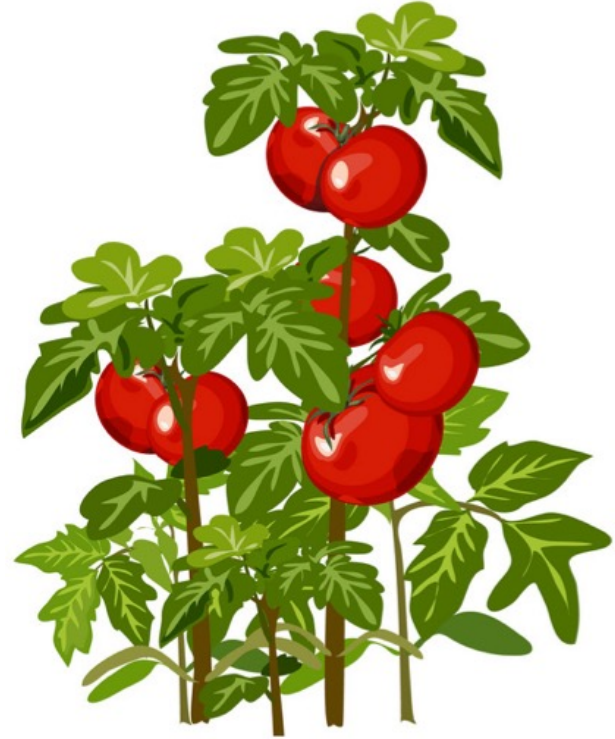

**Tomato**

Salt tolerant

## Objectives

The objective of this study is to **determine the effects of salinity in the water relations** in cucumber and tomato and to determine the **possible mechanisms involved in the stress tolerance caused by salinity** in these plants.

# Materials and methods

---

## Plant materials and growth conditions

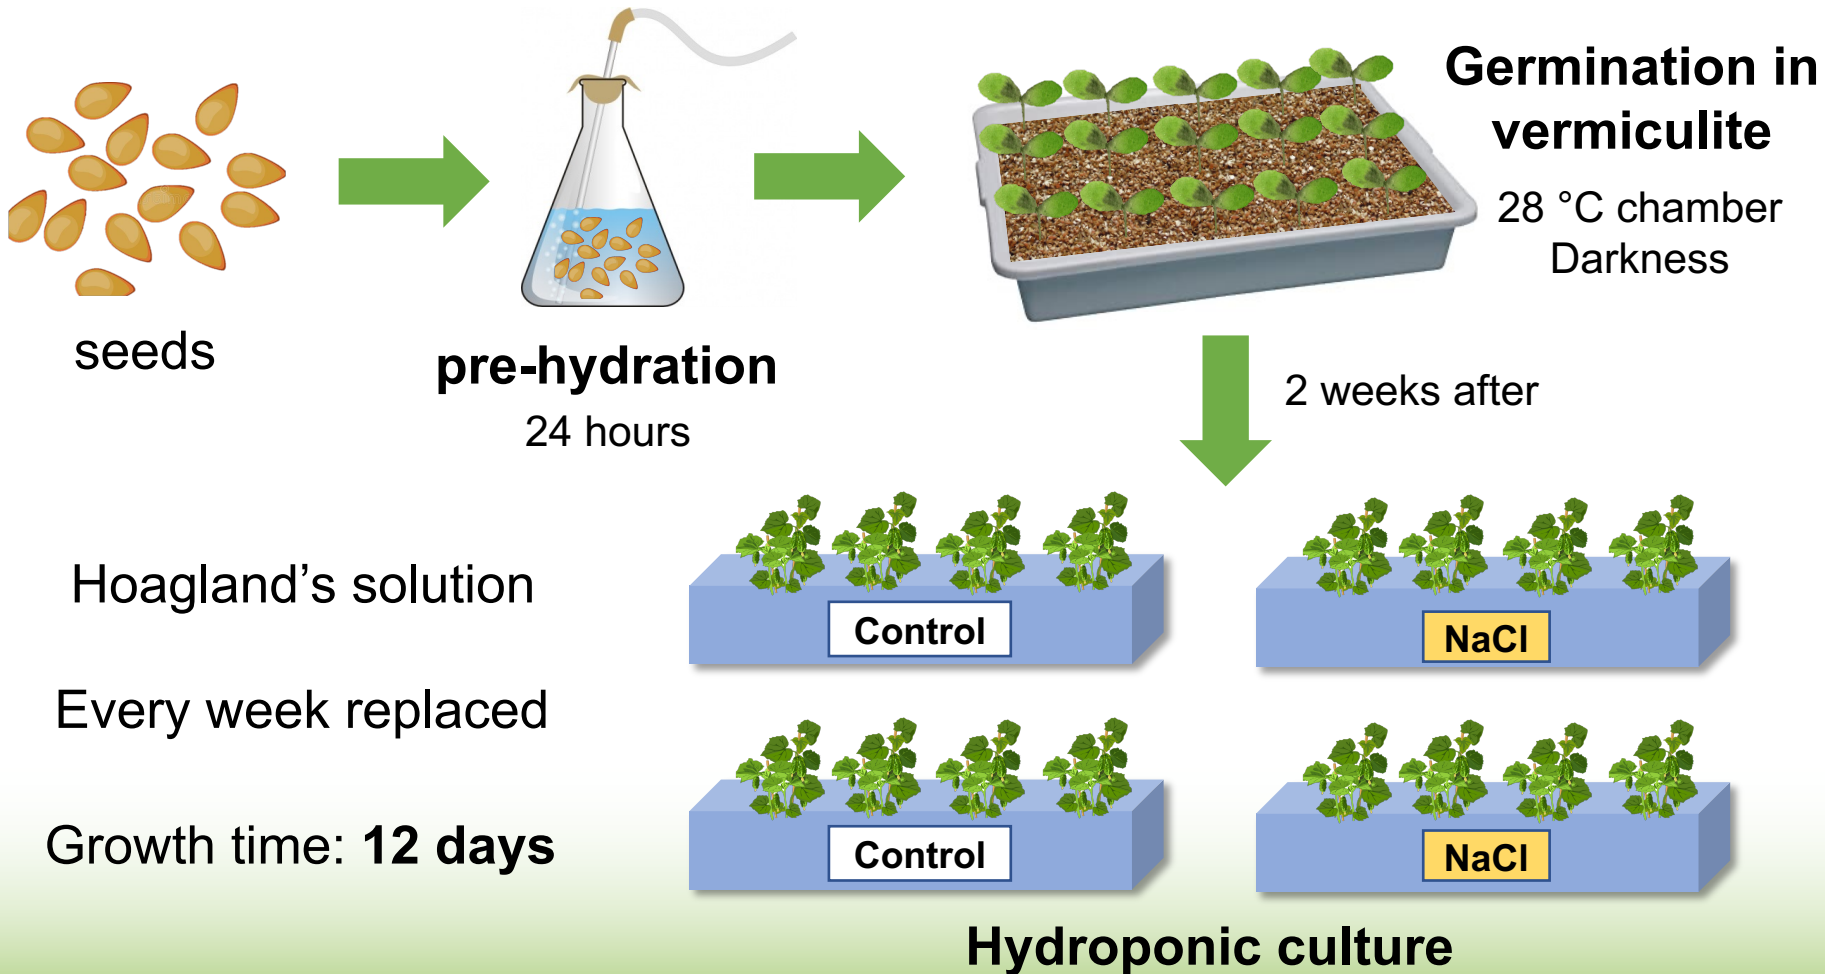

## Root hydraulic conductance ( $L_0$ )

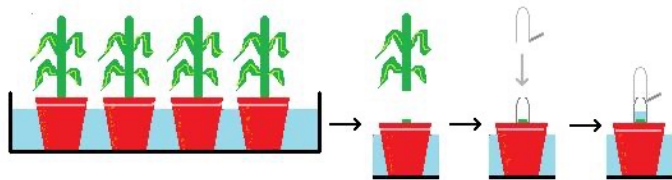

Root exudate

## Relative water content (RWC)

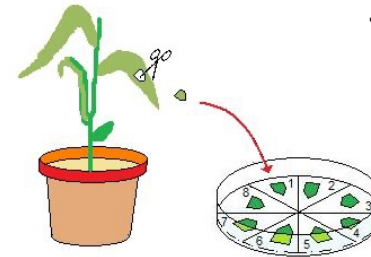

1 cm<sup>2</sup> leaf fragment

Fresh weight  
Turgor weight  
Dry weight

## Stomatal conductance

*TPS-2 Portable  
Photosynthesis System*

2nd, 3rd and 4th fully  
expanded leaves

**Fresh weight (FW) /  
dry weight (DW) ratio**

Shoot  
Root

## Ions concentration

Shoot  
Root

Inductively coupled  
plasma (ICP) analysis

# Results and discussion

---

## Root hydraulic conductance ( $L_0$ )

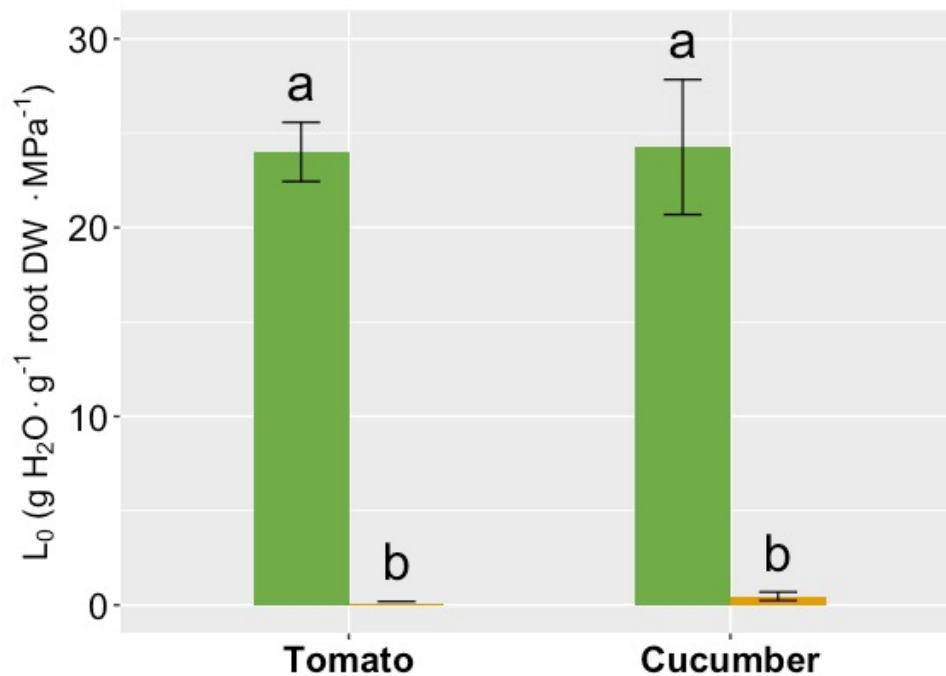

### Growth conditions

- Control
- NaCl 60 mM

- Lower in plants subjected to salinity.
- **Same pattern in both species.**

## Relative water content (RWC)

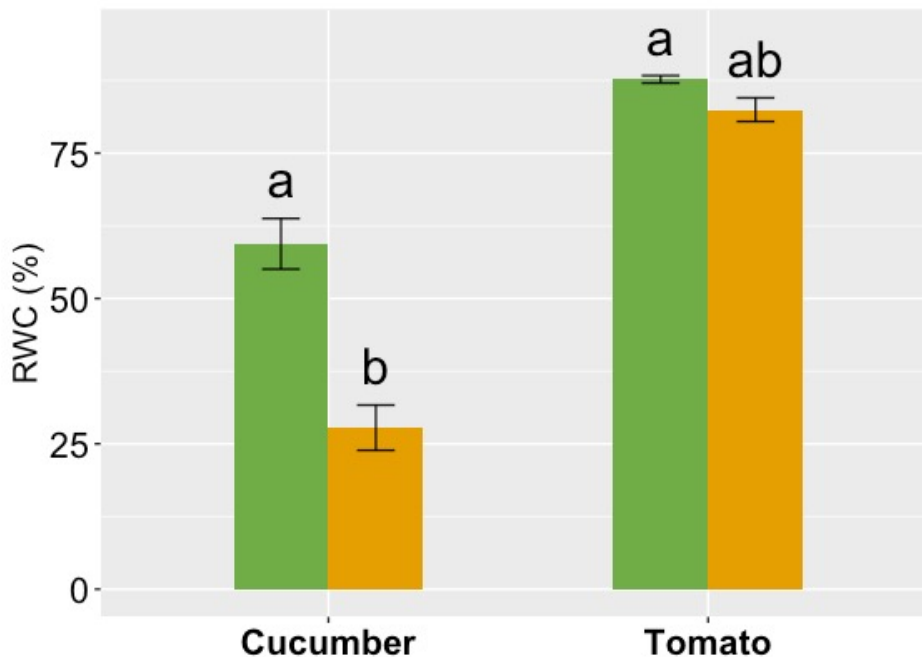

### Growth conditions

- Control
- NaCl 60 mM

- 50 % lower in **cucumber**.
- No changes in **tomato**.

## Stomatal conductance

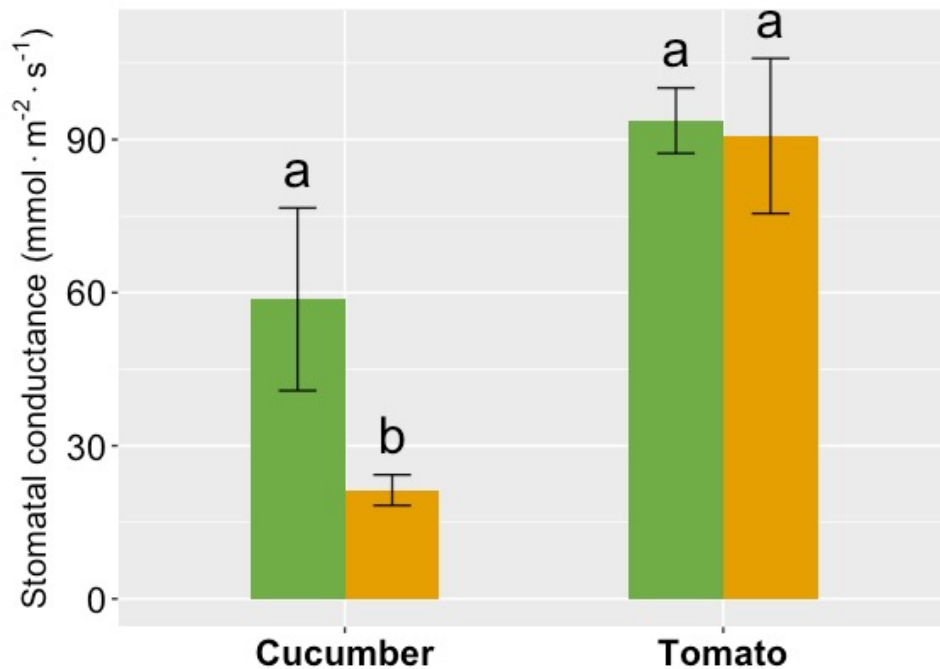

### Growth conditions

- Control
- NaCl 60 mM

- **Cucumber**: significant drop with salinity.
- No changes in **tomato**

# Results and discussion

Growth conditions

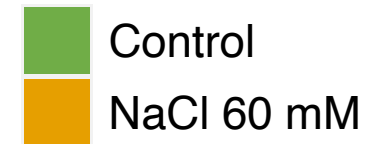

FW/DW ratio

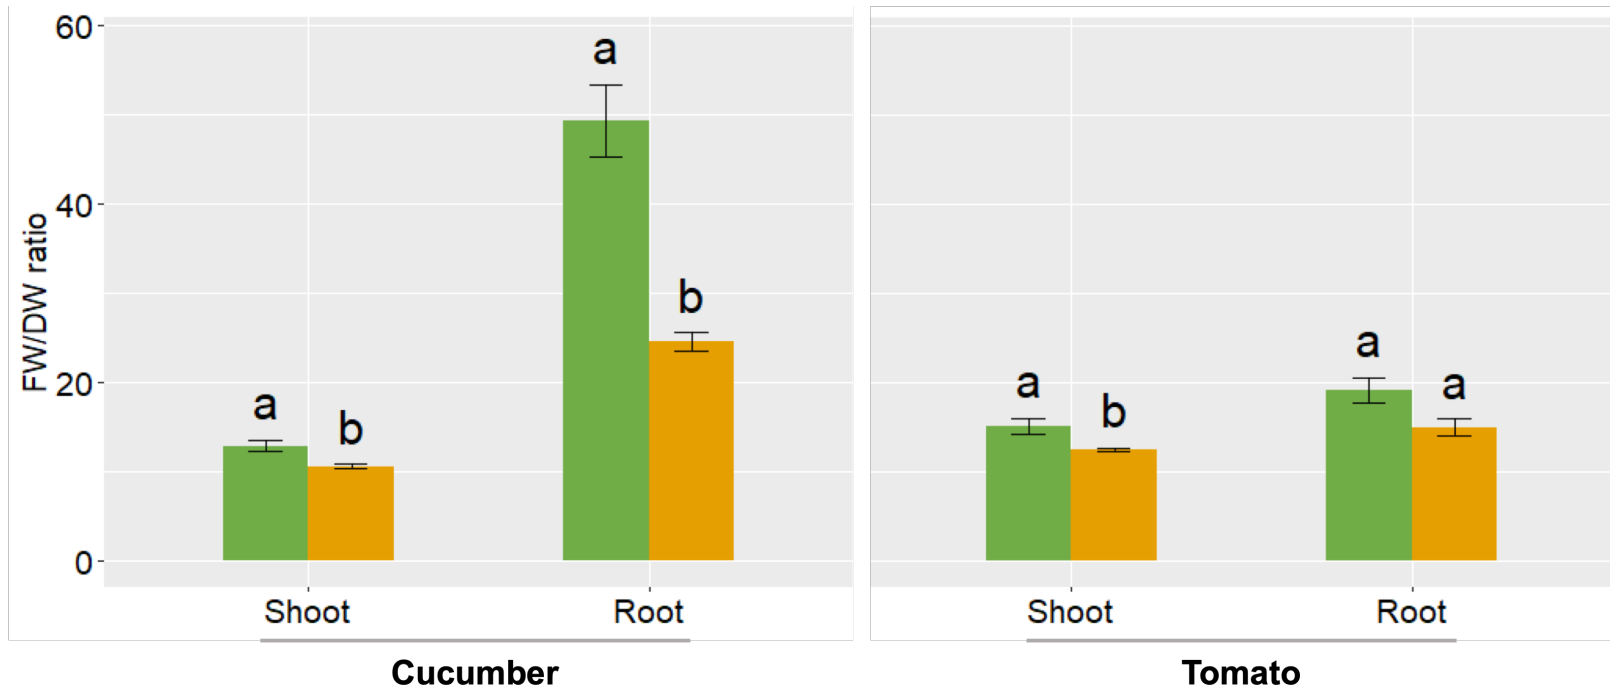

- **Cucumber:** FW/DW ratio decreased in both organs with NaCl.
- **Tomato:** decreased only in shoots under salinity.

# Results and discussion

## Sodium (Na) concentration

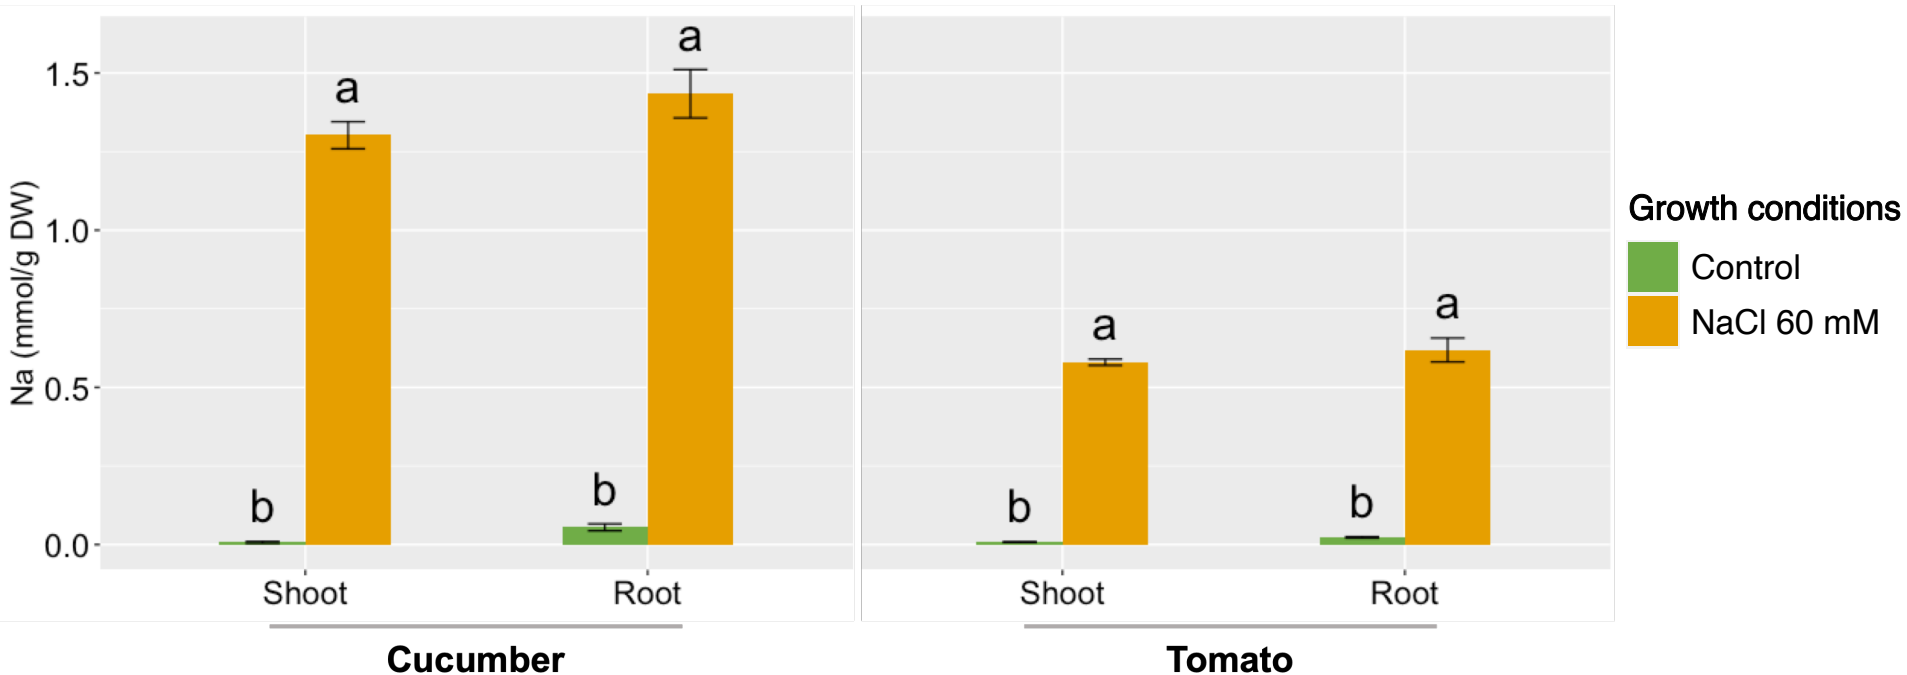

- Na concentration was considerably higher after salinity treatment in both species.
- Na concentration in **tomato** was nearly 50% lower than in **cucumber** plants under salinity stress.

**Membrane water transporters** could have a significant influence on salinity adaptation.

## Aquaporins (AQPs)

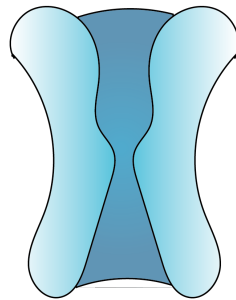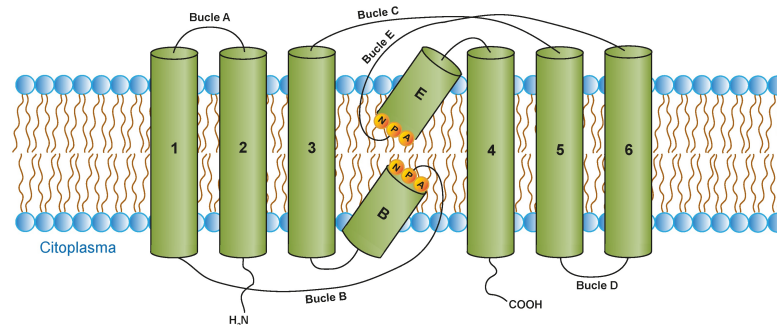

- Transmembrane proteins.
- Water selective transport and other solutes.
- Some AQPs can transport some ions to the vacuole.

# Conclusions

---

In light of all these results, the main conclusions of this study are:

- 1. The maintenance of the water balance in the plant has a considerable influence on the adaptation to salinity stress.**
- 2. Tomato is able to resist salinity better than cucumber, as most of the water relations in the plant have not been altered.**
- 3. Membrane water transporters, like aquaporins, could have a key role in relieving the harmful effects of salinity in the plant, although more in-depth studies will be needed in order to confirm this fact.**

# Acknowledgments

---

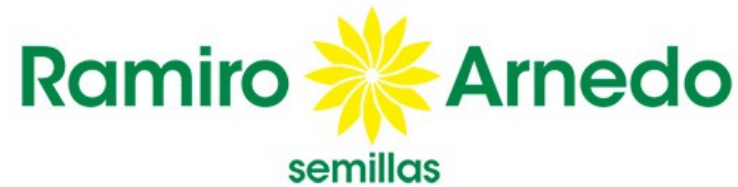

## Funding

---

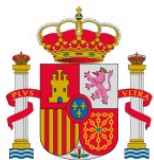

MINISTERIO  
DE CIENCIA  
E INNOVACIÓN

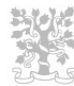

**CSIC**  
CONSEJO SUPERIOR DE INVESTIGACIONES CIENTÍFICAS

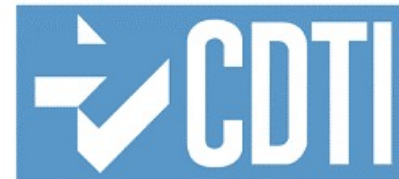

Centro para el  
Desarrollo  
Tecnológico  
Industrial
